# Supplementary material for: Impact of the thermal properties of the environment on the hot-band absorption-assisted single-photon upconversion
Source: Royal Society of Chemistry journal article supplement (doi:10.1039/d2cp04062j), 2022-01-01
Supplement: d2cp04062j1.pdf [file d2cp04062j1.pdf]

## SUPPLEMENTARY MATERIAL

### Impact of Thermal Properties of the Environment on the Hot-Band Absorption-Assisted Single-Photon Upconversion

Oleg Dimitriev<sup>\*1</sup>, Yuri Slominskii<sup>2</sup>

<sup>1</sup> V.Lashkaryov Institute of Semiconductor Physics NAS of Ukraine, pr. Nauki 41, Kyiv 03028,  
Ukraine

<sup>2</sup> Institute of Organic Chemistry NAS of Ukraine, 5 Murmanska Str., Kyiv 02660, Ukraine

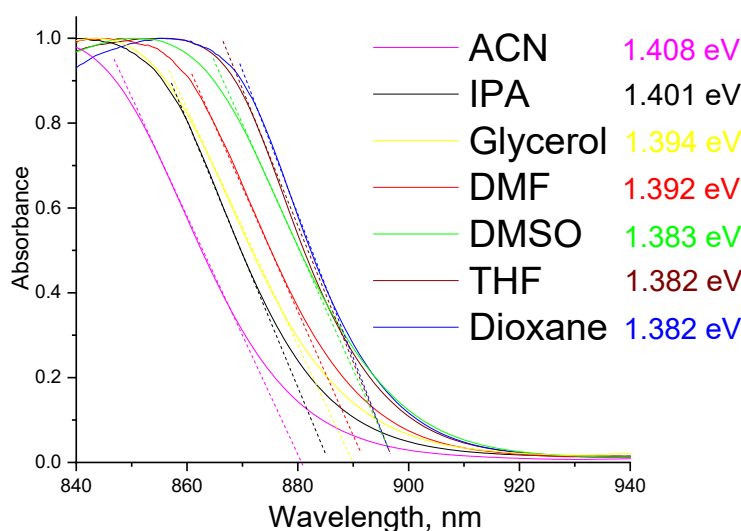

a

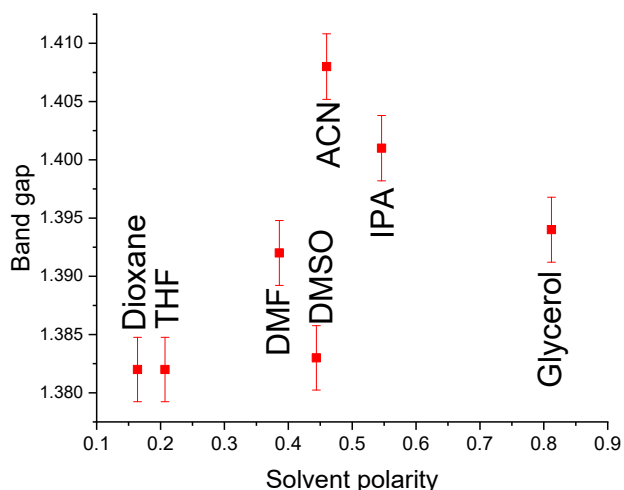

b

Fig. S1. (a) Low-energy edge of the normalized absorption band of the dye solutions. Calculated bandgaps for the different solvents are indicated; (b) Dye bandgap as a function of the solvent polarity.

\* Corresponding author, e-mail: [dimitr@isp.kiev.ua](mailto:dimitr@isp.kiev.ua)

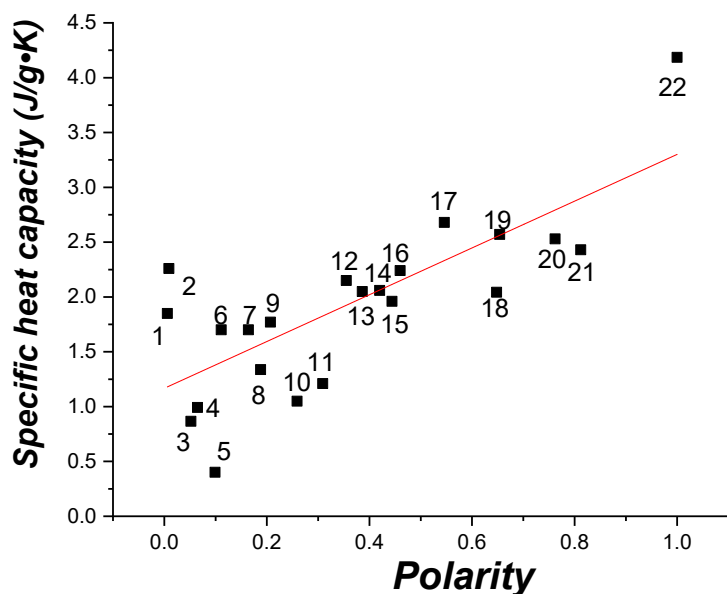

Fig. S2. Dependence of SHC on solvent polarity for 22 different solvents: 1- cyclohexane, 2- hexane, 3- carbon tetrachloride, 4- carbon disulfide, 5- toluene, 6- benzene, 7- dioxane, 8- chlorobenzene, 9- THF, 10- chloroform, 11- methylene chloride, 12- acetone, 13- DMF, 14- aniline, 15- DMSO, 16- acetonitrile, 17- IPA, 18- acetic acid, 19- ethanol, 20- methanol, 21- glycerine, 22- water.

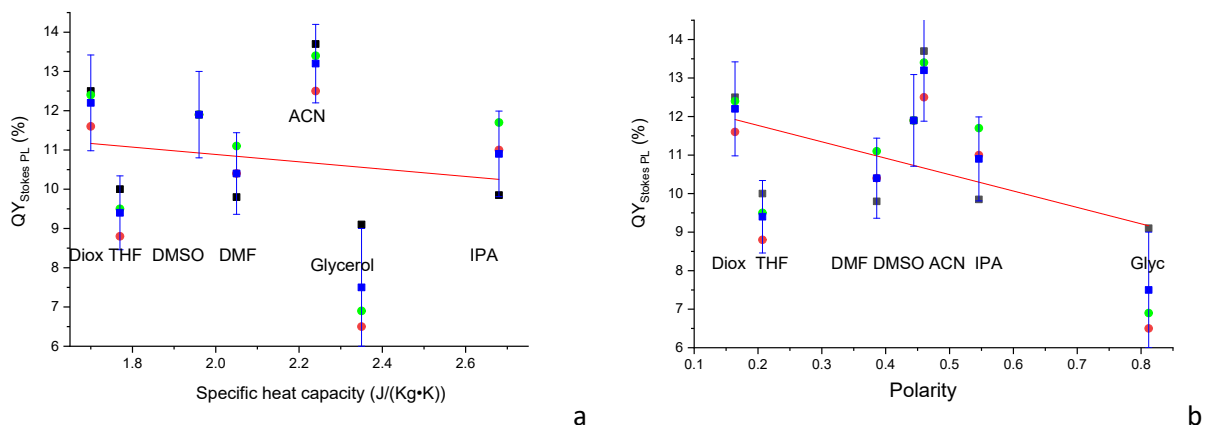

Fig. S3. QY of the Stokes emission ( $\lambda_{exc}=780$  nm) as a function of (a) specific heat capacity and (b) polarity of the solvents used. Variation of QY in different set of experiments, shown by black, red, and blue symbols, allowed us to establish the accuracy of about 20%. The linear fit with the slope close to unity indicates that QY of the Stokes emission is slightly dependent of the solvent specific heat capacity.

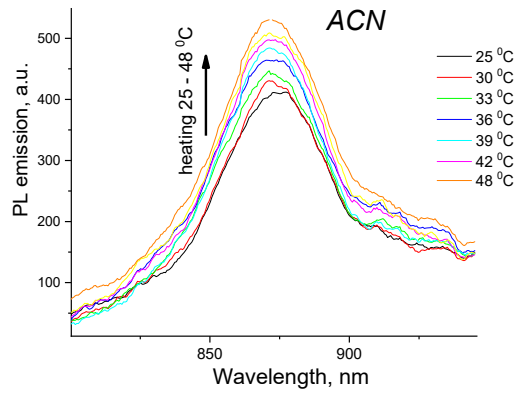

a

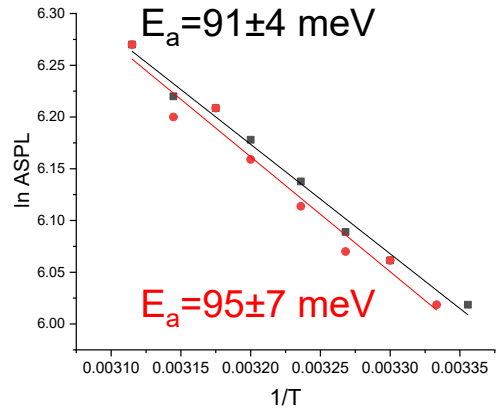

b

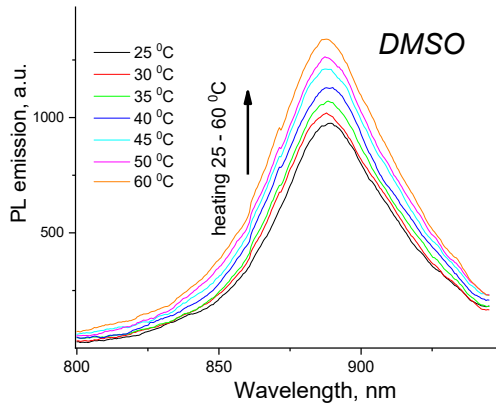

c

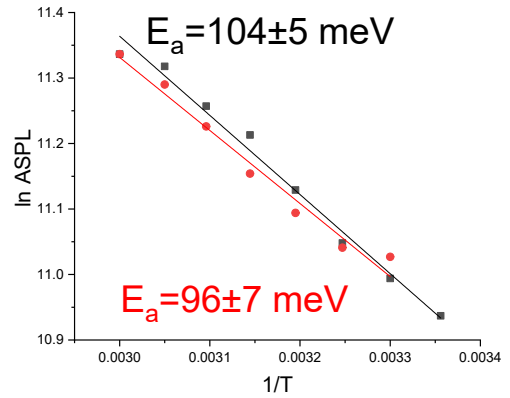

d

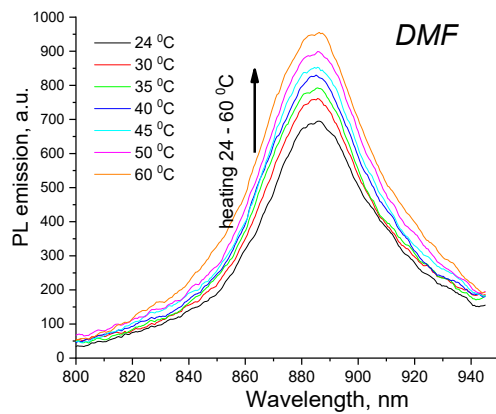

e

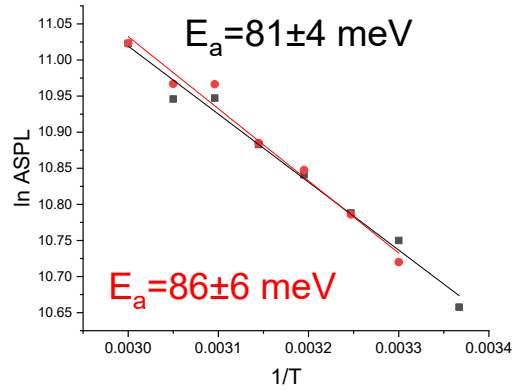

f

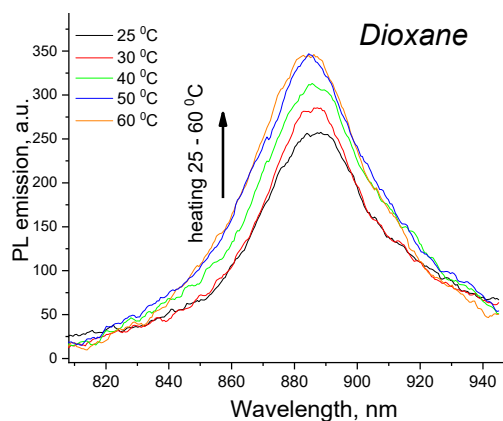

g

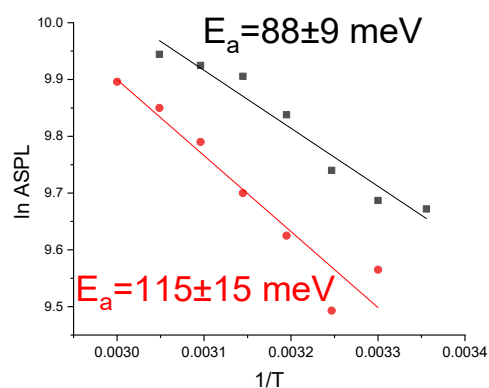

h

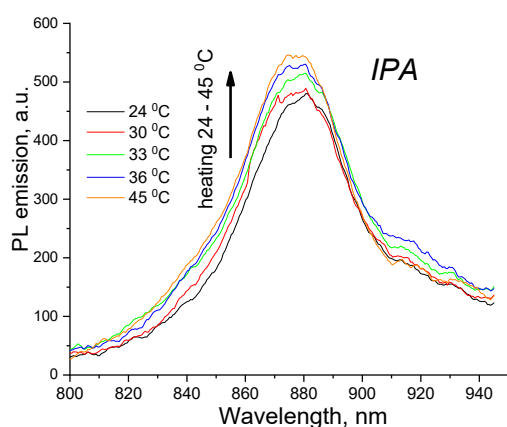

j

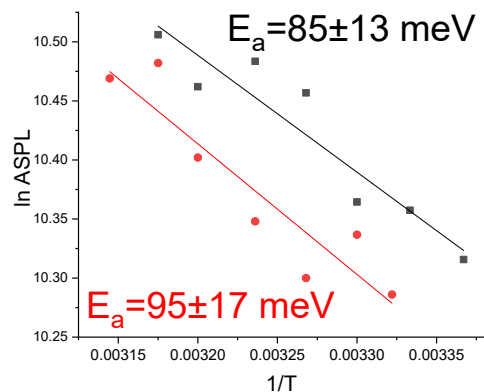

k

Fig. S4. (a, c, e, g, j) Temperature dependences of ASPL ( $\lambda_{\text{exc}}=980$  nm) and (b, d, f, h, k) Arrhenius plots of ASPL for (a, b) ACN, (c, d) DMSO (e, f) DMF, (g, h) Dioxane ( $10^{-5}$  M), and (j, k) IPA dye solutions (black symbols for heating and red symbols for cooling process, respectively). Concentration everywhere is  $10^{-5}$  M.

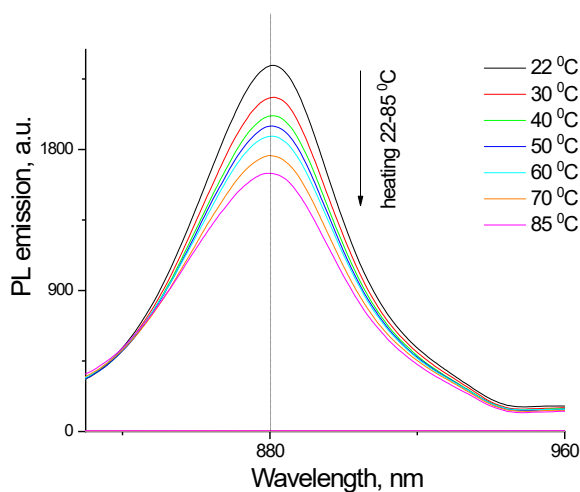

Fig. S5. Temperature dependence of the Stokes emission ( $\lambda_{\text{exc}}=820$  nm) of the DMF dye solution ( $10^{-5}$  M).

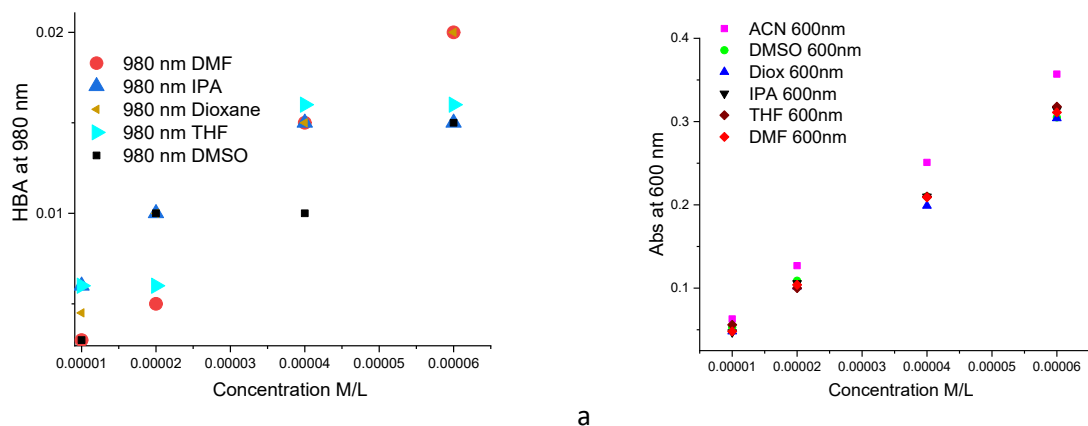

Fig. S6. Concentration dependence of the absorption of different solutions at (a) 980 nm and (b) 600 nm.
